# Supplementary material
Source: PubMed Central journal article supplement (PMC6548178)
Supplement: NIHMS999900-supplement-Supp_Table_1.pdf [file NIHMS999900-supplement-Supp_Table_1.pdf]

## Supplemental Data

Supplemental Table 1. NF- $\kappa$ B consensus sequence in genes overexpressed in NOS2 high ER-breast tumors.

| Gene symbol | Fold change <sup>A</sup> | Location <sup>B</sup> | Strand <sup>C</sup> | Gene name                           | Basal-like signature gene <sup>D</sup> |
|-------------|--------------------------|-----------------------|---------------------|-------------------------------------|----------------------------------------|
| KRT6A       | 42.1                     | 548                   | -                   | Keratin 6A                          | yes                                    |
| KRT6C       | 42.1                     | 548                   | -                   | Keratin 6C                          | yes                                    |
| FLJ21511    | 12.2                     | 172                   | +                   | Hypothetical protein FLJ21511       | no                                     |
|             |                          | 687                   | +                   |                                     |                                        |
| IL8         | 6.8                      | 477                   | +                   | Interleukin 8                       | no                                     |
|             |                          | 477                   | -                   |                                     |                                        |
| S100A8      | 5.0                      | 1091                  | -                   | S100 calcium binding protein A8     | yes                                    |
|             |                          | 1107                  | -                   |                                     |                                        |
|             |                          | 1108                  | +                   |                                     |                                        |
|             |                          | 1228                  | +                   |                                     |                                        |
|             |                          | 1228                  | -                   |                                     |                                        |
| CDH3        | 4.3                      | 652                   | +                   | P-cadherin                          | yes                                    |
|             |                          | 1639                  | -                   |                                     |                                        |
| SLC7A5      | 4.2                      | 11                    | -                   | Solute carrier family 7, member 5   | no                                     |
|             |                          | 11                    | +                   |                                     |                                        |
|             |                          | 71                    | +                   |                                     |                                        |
|             |                          | 123                   | +                   |                                     |                                        |
|             |                          | 360                   | -                   |                                     |                                        |
|             |                          | 360                   | +                   |                                     |                                        |
| C16ORF60    | 4.1                      | 425                   | -                   | Chromosome 16 open reading frame 60 | no                                     |
|             |                          | 614                   | +                   |                                     |                                        |
| ANXA8       | 3.9                      | 378                   | +                   | Annexin A8                          | yes                                    |
|             |                          | 453                   | -                   |                                     |                                        |
|             |                          | 639                   | +                   |                                     |                                        |
| SLC6A8      | 3.9                      | 10                    | -                   | Solute carrier family 6, member 8   | no                                     |
|             |                          | 59                    | +                   |                                     |                                        |
|             |                          | 213                   | -                   |                                     |                                        |
|             |                          | 214                   | +                   |                                     |                                        |
|             |                          | 735                   | +                   |                                     |                                        |
|             |                          | 961                   | -                   |                                     |                                        |

|         |     |  |      |   |                                                        |     |
|---------|-----|--|------|---|--------------------------------------------------------|-----|
|         |     |  | 1107 | + |                                                        |     |
|         |     |  | 1107 | - |                                                        |     |
| TRIM29  | 3.8 |  | 233  | - | Tripartite motif-containing 29                         | yes |
|         |     |  | 405  | - |                                                        |     |
| KLF5    | 3.4 |  | 39   | - | Kruppel-like factor 5                                  | yes |
| GGH     | 3.2 |  | 487  | + | Gamma-glutamyl hydrolase                               |     |
|         |     |  | 612  | + |                                                        |     |
| KLK8    | 3.2 |  | 562  | + | Kallikrein 8                                           | yes |
|         |     |  | 562  | - |                                                        |     |
|         |     |  | 858  | - |                                                        |     |
|         |     |  | 1042 | - |                                                        |     |
|         |     |  | 1043 | + |                                                        |     |
|         |     |  | 1074 | + |                                                        |     |
| CYP39A1 | 3.1 |  | 73   | + | Cytochrome P450, family 39, subfamily A, polypeptide 1 | yes |
|         |     |  | 722  | + |                                                        |     |
|         |     |  | 722  | - |                                                        |     |
|         |     |  | 954  | - |                                                        |     |
|         |     |  | 954  | + |                                                        |     |
| SRD5A1  | 2.9 |  | 214  | + | Steroid-5-alpha-reductase, alpha polypeptide 1         | yes |
|         |     |  | 277  | + |                                                        |     |
|         |     |  | 609  | - |                                                        |     |
| HMGB3   | 2.8 |  | 126  | + | High-mobility group box 3                              | no  |
|         |     |  | 344  | + |                                                        |     |
| SFN     | 2.8 |  | 33   | + | Stratifin                                              | yes |
|         |     |  | 33   | - |                                                        |     |
| PTPLB   | 2.6 |  | 92   | - | Protein tyrosine phosphatase-like, member b            | yes |
|         |     |  | 437  | - |                                                        |     |
|         |     |  | 437  | + |                                                        |     |
| CD59    | 2.4 |  | 270  | + | CD59 molecule                                          | yes |
|         |     |  | 431  | + |                                                        |     |
| WNT5A   | 2.4 |  | 395  | - | Wingless-type MMTV integration site family, member 5A  | no  |

|         |     |  |     |   |                                                        |     |
|---------|-----|--|-----|---|--------------------------------------------------------|-----|
|         |     |  | 782 | - |                                                        |     |
| RPE     | 2.3 |  | 454 | + | Ribulose-5-phosphate-3-epimerase                       | no  |
| ASS     | 2.3 |  | 169 | + | Arginosuccinate synthetase                             | no  |
|         |     |  | 169 | - |                                                        |     |
| SLC35A2 | 2.1 |  | 656 | - | Solute carrier family 35, member A2                    | no  |
| TPI1    | 2.0 |  | 263 | + | Triosephosphate isomerase 1                            | no  |
|         |     |  | 359 | + |                                                        |     |
| HCCS    | 2.0 |  | 28  | - | Holocytochrome c synthase                              | yes |
|         |     |  | 195 | - |                                                        |     |
| ENO1    | 2.0 |  | 470 | - | Enolase 1                                              | no  |
| CD44    | 2.0 |  | 590 | - | CD44 molecule                                          | yes |
|         |     |  | 891 | + |                                                        |     |
|         |     |  | 969 | + |                                                        |     |
| CALU    | 1.9 |  | 379 | - | Calumenin                                              | no  |
|         |     |  | 655 | + |                                                        |     |
| MRPL3   | 1.8 |  | 637 | - | Mitochondrial ribosomal protein L3                     | no  |
|         |     |  | 638 | + |                                                        |     |
| PPP1CB  | 1.7 |  | 411 | + | Protein phosphatase 1, catalytic subunit, beta isoform | no  |
|         |     |  | 438 | + |                                                        |     |
|         |     |  | 438 | - |                                                        |     |

<sup>A</sup> Fold change in High vs. Low Expressing NOS2 Tumors (Glynn et al, JCI 2010).

<sup>B</sup> Base pairs from TSS.

<sup>C</sup> Sense (+) or anti-sense (-) DNA strand.

<sup>D</sup> Previously published basal-like signature genes (from Glynn et al, JCI 2010).
